# Supplementary material for: Baseline serum folate, vitamin B12 and the risk of prostate and breast cancer using data from the Swedish AMORIS cohort
Source: Springer Nature journal article supplement (doi:10.1007/s10552-019-01170-6), 2019-04-24
Supplement: MOESM1 [file 16673894]

**Supplemental Table 1** Hazard ratios (HR) and 95% Confidence Intervals (CI) for the association between vitamin B12, folate and PCa risk categories in fasting participants

| **Fasting N=2982** | **Vitamin B12 (pmol/L)** | | |  | **Folate (nmol/L)** | | |
| --- | --- | --- | --- | --- | --- | --- | --- |
| <150 | 150-650 | >650 |  | <5 | 5-32 | >32 |
| (n = 89) | (n = 2700) | (n = 193) | (n = 6) | (n = 2675) | (n = 301) |
| **PCa** |  |  |  |  |  |  |  |
| N = 248 | 5 | 230 | 13 |  | 1 | 226 | 21 |
| Crude HR (95% CI) | 0.68 (0.28-1.66) | 1.00 (ref) | 1.02 (0.58-1.79) |  | 2.65 (0.37-18.86) | 1.00 (ref) | 0.96 (0.61-1.50) |
| Age-adjusted HR (95% CI) | 0.64 (0.27-1.56) | 1.00 (ref) | 0.85 (0.48-1.48) |  | 4.33 (0.61-30.96) | 1.00 (ref) | 0.76 (0.49-1.19) |
| Multivariate adjusted HR (95% CI) | 0.97 (0.40-2.38) | 1.00 (ref) | 0.97 (0.53-1.80) |  | NA | 1.00 (ref) | 0.60 (0.34-1.06) |
| ***Risk categories*** | | | | | | | |
| ***Low risk*** |  |  |  |  |  |  |  |
| N = 44 | 2 | 41 | 1 |  | 0 | 37 | 7 |
| Crude HR (95% CI) | 1.61 (0.39-6.64) | 1.00 (ref) | 0.47 (0.06-3.41) |  | NA | 1.00 (ref) | 2.06 (0.92 -4.61) |
| Age-adjusted HR (95% CI) | 1.60 (0.39-6.61) | 1.00 (ref) | 0.44 (0.06-3.17) |  | NA | 1.00 (ref) | 1.87 (0.83-4.22) |
| Multivariate adjusted HR (95% CI) | 1.89 (0.45-7.96) | 1.00 (ref) | 0.45 (0.06-3.34) |  | NA | 1.00 (ref) | 1.66 (0.69-4.00) |
| ***Intermediate risk*** | | | | | | | |
| N = 50 | 1 | 44 | 5 |  | 0 | 47 | 3 |
| Crude HR (95% CI) | 0.71 (0.10-5.18) | 1.00 (ref) | 2.24 (0.89-5.66) |  | NA | 1.00 (ref) | 0.69 (0.21-2.22) |
| Age-adjusted HR (95% CI) | 0.70 (0.10-5.10) | 1.00 (ref) | 2.05 (0.81-5.19) |  | NA | 1.00 (ref) | 0.59 (0.18-1.91) |
| Multivariate adjusted HR (95% CI) | 1.00 (0.14-7.40) | 1.00 (ref) | 2.44 (0.96-6.24) |  | NA | 1.00 (ref) | 0.37 (0.09-1.54) |
| ***High risk*** | | | | | | | |
| N = 53 | 0 | 52 | 1 |  | 0 | 52 | 1 |
| Crude HR (95% CI) | NA | 1.00 (ref) | 0.36 (0.05-2.62) |  | NA | 1.00 (ref) | 0.20 (0.03-1.46) |
| Age-adjusted HR (95% CI) | NA | 1.00 (ref) | 0.29 (0.04-2.10) |  | NA | 1.00 (ref) | 0.15 (0.02-1.01) |
| Multivariate adjusted HR (95% CI) | NA | 1.00 (ref) | 0.33 (0.04-2.44) |  | NA | 1.00 (ref) | NA |
| ***Regional/distant metastatic*** | |  |  |  |  |  |  |
| N = 22 | 1 | 20 | 1 |  | 0 | 19 | 3 |
| Crude HR (95% CI) | 1.85 (0.21-11.81) | 1.00 (ref) | 0.89 (0.12-6.70) |  | NA | 1.00 (ref) | 1.65 (0.48-5.49) |
| Age-adjusted HR (95% CI) | 1.47 (0.20-10.95) | 1.00 (ref) | 0.68 (0.09-5.07) |  | NA | 1.00 (ref) | 1.21 (0.35-4.11) |
| Multivariate adjusted HR (95% CI) | 2.72 (0.34-21.41) | 1.00 (ref) | NA |  | NA | 1.00 (ref) | 1.34 (0.30-6.07) |

Multivariate models adjusted for age, education level, SES, CCI, serum glucose, triglycerides and cholesterol

**Supplemental Table 2** Hazard ratios (HR) and 95% Confidence Intervals (CI) for the association between vitamin B12, folate and BC risk categories in fasting participants

| **Fasting N= 6288** | **Vitamin B12 (pmol/L)** | | |  | **Folate (nmol/L)** | | |
| --- | --- | --- | --- | --- | --- | --- | --- |
| <150 | 150-650 | >650 |  | <5 | 5-32 | >32 |
| (n = 183) | (n = 5633) | (n = 472) | (n = 20) | (n = 5395) | (n = 873) |
| **BC** |  |  |  |  |  |  |  |
| N= 300 | 7 | 275 | 18 |  | 1 | 242 | 57 |
| Crude HR (95% CI) | 0.81 (0.38-1.72) | 1.00 (ref) | 0.92 (0.57-1.48) |  | 1.24 (0.17-8.87) | 1.00 (ref) | **1.57 (1.17-2.10)** |
| Age-adjusted HR (95% CI) | 0.81 (0.38-1.71) | 1.00 (ref) | 0.79 (0.49-1.27) |  | 1.46 (0.20-10.39) | 1.00 (ref) | **1.40 (1.05-1.87)** |
| Multivariate adjusted HR (95% CI) | 0.61 (0.22-1.64) | 1.00 (ref) | 0.77 (0.44-1.35) |  | 1.88 (0.26-13.50) | 1.00 (ref) | **1.47 (1.06-2.04)** |
| **Severity groups**1 |  |  |  |  |  |  |  |
| ***Good*** |  |  |  |  |  |  |  |
| N = 151 | 3 | 141 | 7 |  | 1 | 120 | 30 |
| Crude HR (95% CI) | 0.68 (0.22-2.14) | 1.00 (ref) | 0.69 (0.32-1.48) |  | 2.47 (0.35-17.64) | 1.00 (ref) | **1.66 (1.11-2.48)** |
| Age-adjusted HR (95% CI) | 0.68 (0.22-2.14) | 1.00 (ref) | 0.63 (0.29-1.35) |  | 2.69 (0.38-19.29) | 1.00 (ref) | **1.55 (1.04-2.33)** |
| Multivariate adjusted HR (95% CI) | 0.54 (0.13-2.18) | 1.00 (ref) | 0.65 (0.28-1.47) |  | 3.35 (0.46-24.34) | 1.00 (ref) | 1.46 (0.94-2.29) |
| ***Moderate*** | | | | | | | |
| N = 70 | 1 | 65 | 4 |  | 0 | 59 | 11 |
| Crude HR (95% CI) | 0.49 (0.07-3.50) | 1.00 (ref) | 0.89 (0.32-2.44) |  | NA | 1.00 (ref) | 1.24 (0.65-2.37) |
| Age-adjusted HR (95% CI) | 0.49 (0.07-3.52) | 1.00 (ref) | 0.75 (0.27-2.06) |  | NA | 1.00 (ref) | 1.09 (0.57-2.07) |
| Multivariate adjusted HR (95% CI) | 0.71 (0.10-5.13) | 1.00 (ref) | 1.07 (0.38-2.96) |  | NA | 1.00 (ref) | 1.05 (0.49-2.22) |
| ***Severe*** |  |  |  |  |  |  |  |
| N = 21 | 1 | 19 | 1 |  | 0 | 18 | 3 |
| Crude HR (95% CI) | 1.70 (0.23-12.67) | 1.00 (ref) | 0.74 (0.10-5.54) |  | NA | 1.00 (ref) | 1.12 (0.33-3.79) |
| Age-adjusted HR (95% CI) | 1.69 (0.23-12.66) | 1.00 (ref) | 0.77 (0.10-5.79) |  | NA | 1.00 (ref) | 1.15 (0.34-3.94) |
| Multivariate adjusted HR (95% CI) | 1.74 (0.23-13.22) | 1.00 (ref) | NA |  | NA | 1.00 (ref) | 0.87 (0.20-3.82) |

1BC cases were divided into three severity groups (good, moderate and severe) based on ER status, age at diagnosis and pTNM stage.
 Multivariate models adjusted for age, education level, SES, CCI, serum glucose, triglycerides and cholesterol.
